# Supplementary material
Source: PubMed Central journal article supplement (PMC4987182)

Exponential curves  
for original data

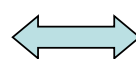

Linear curves after log  
transformation

1-phasic

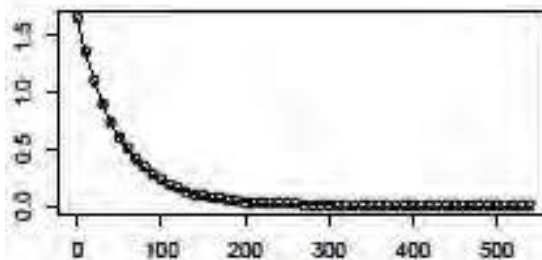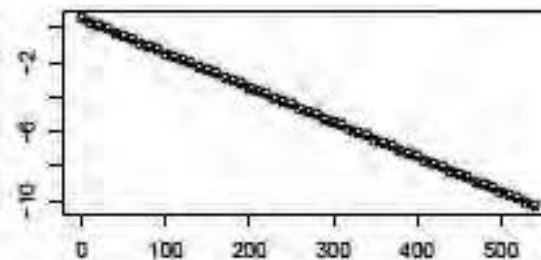

2-phasic

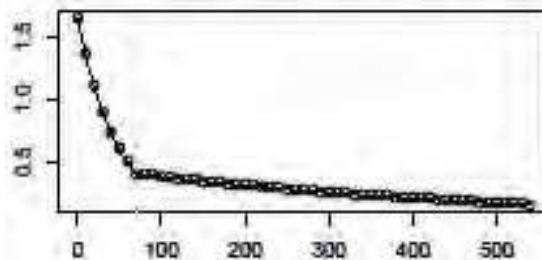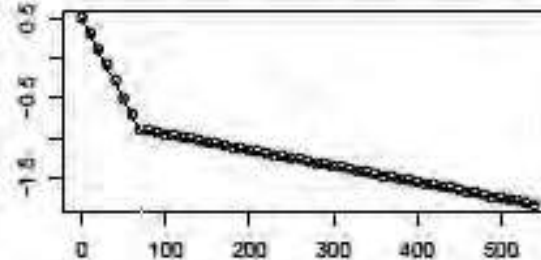

3-phasic

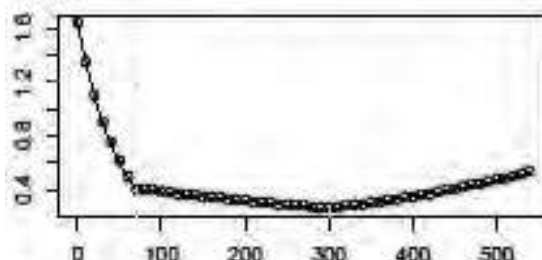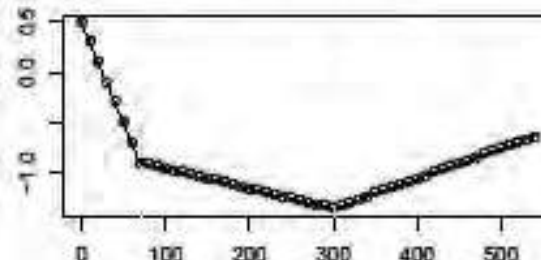

4-phasic

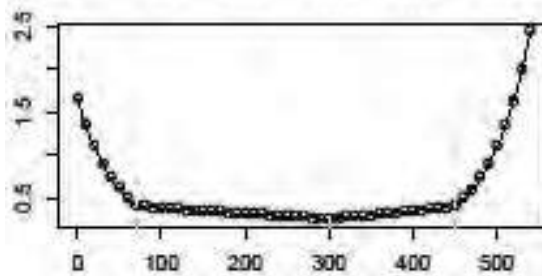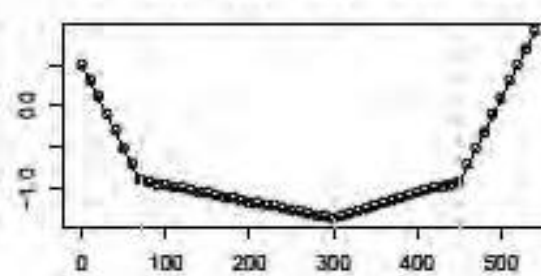

**a**

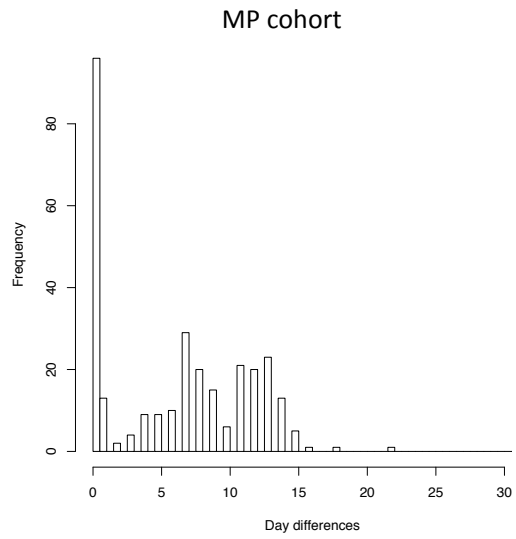

**b**

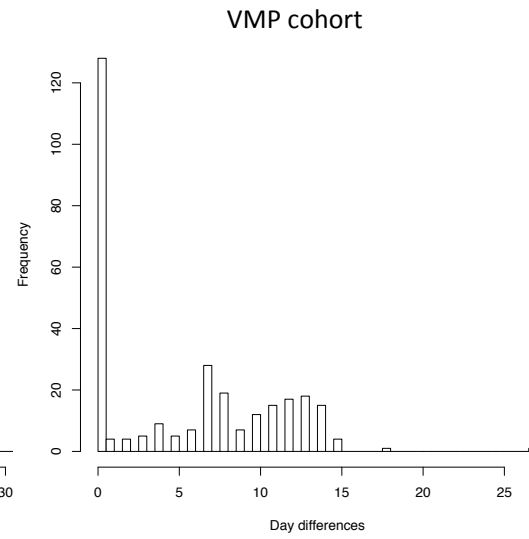

**c**

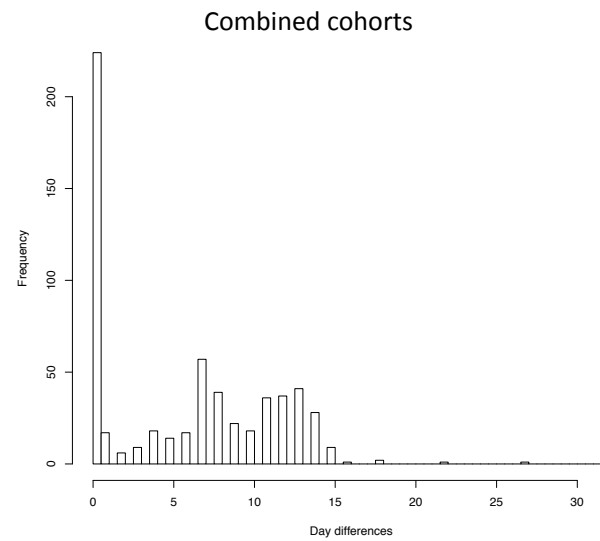

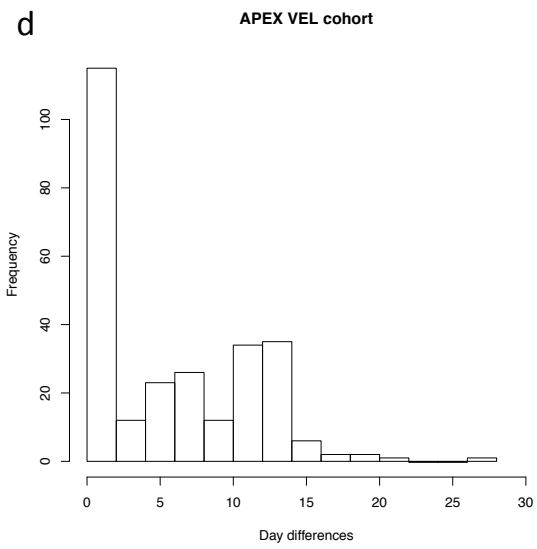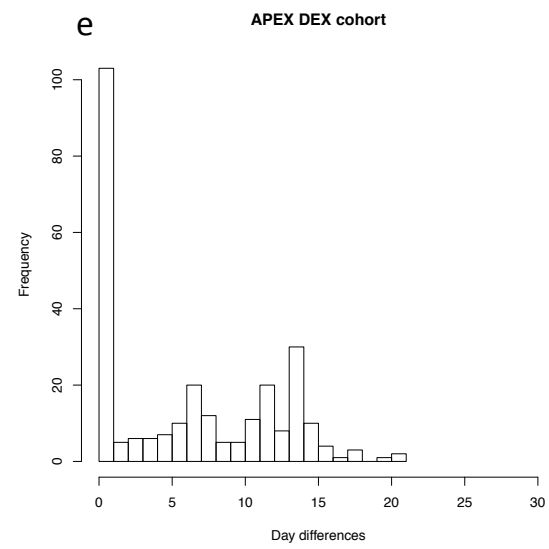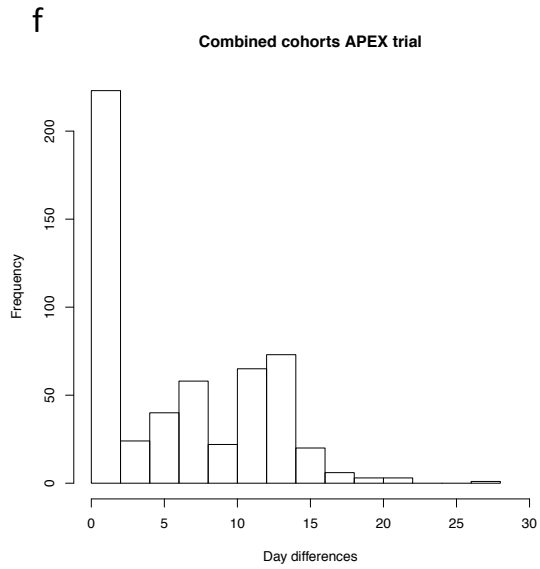

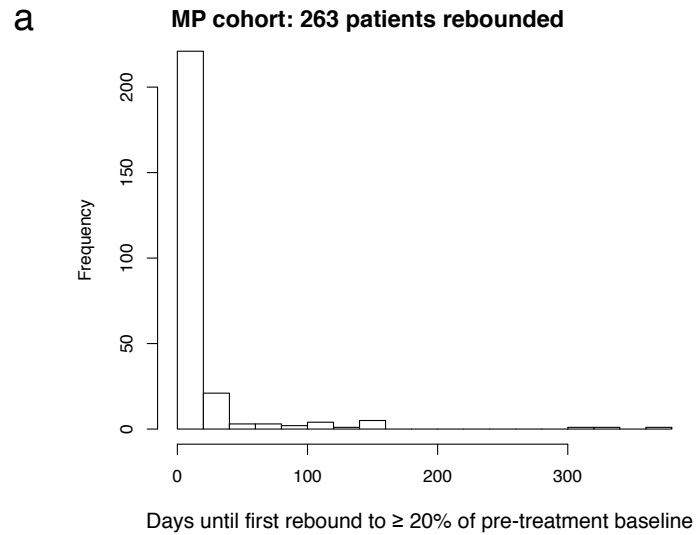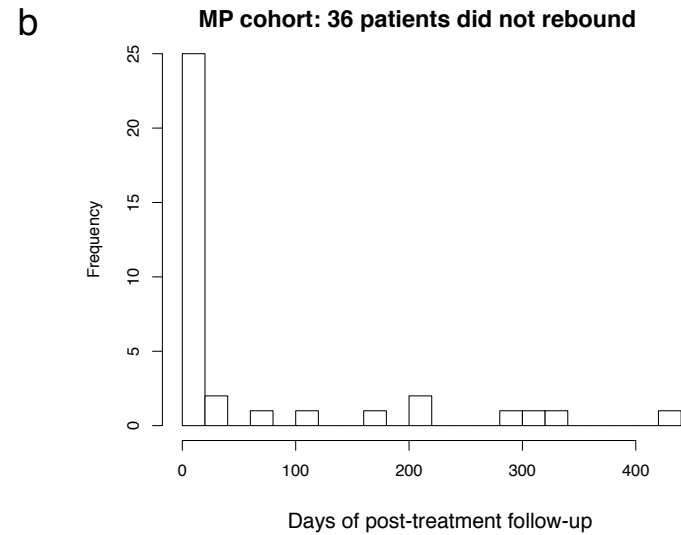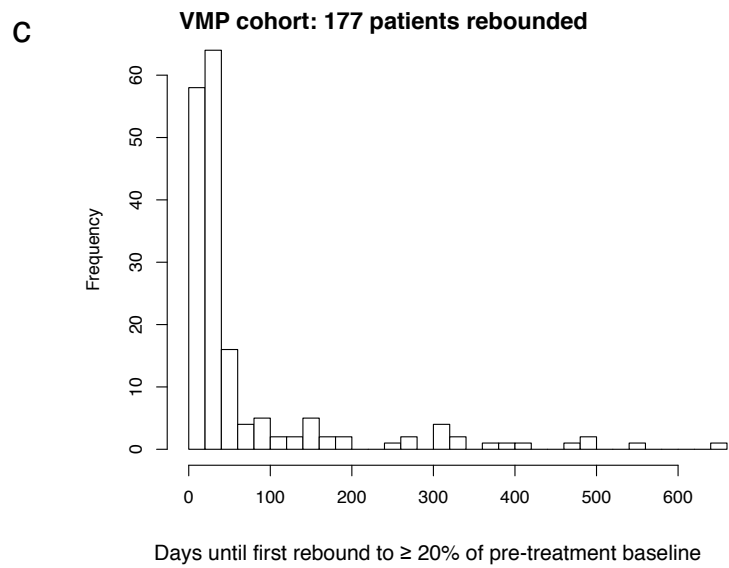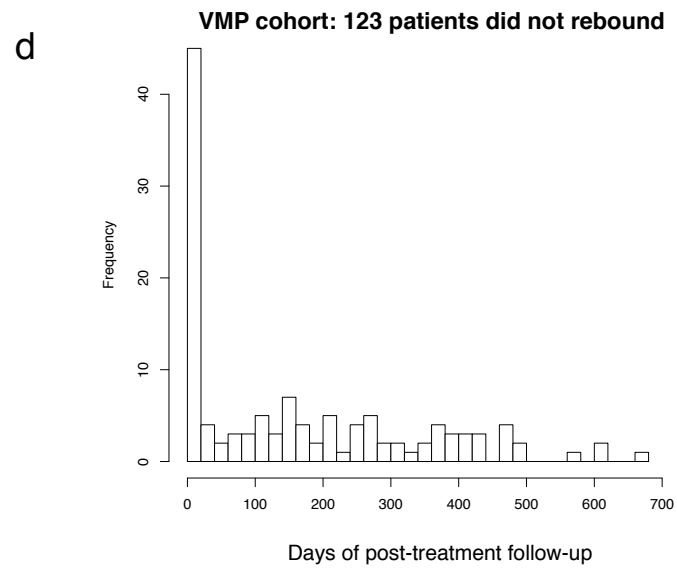

**e** APEX DEX cohort: 225 patients rebound

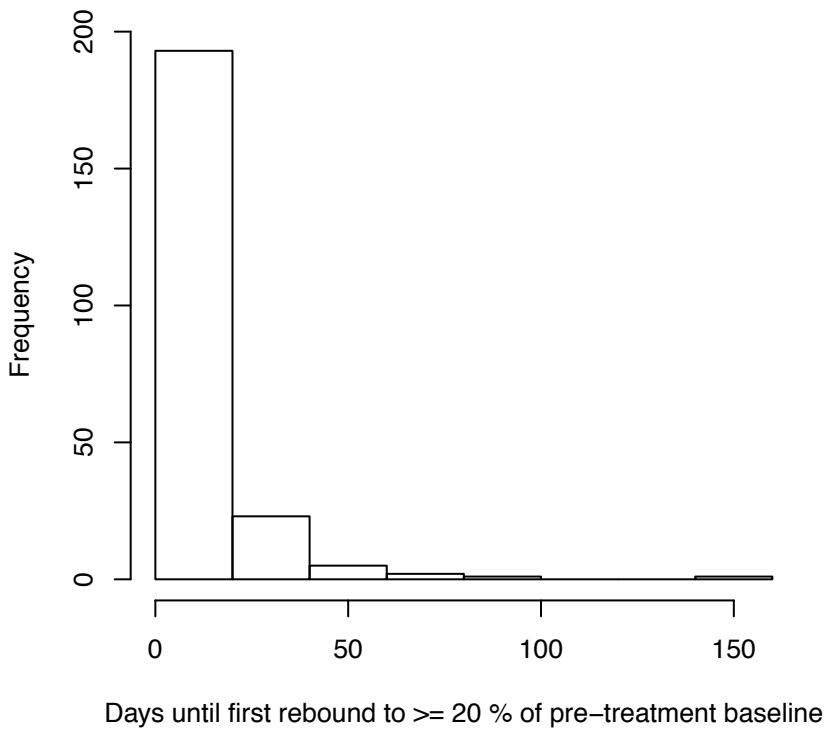

**f** APEX DEX cohort: 44 patients did not rebound

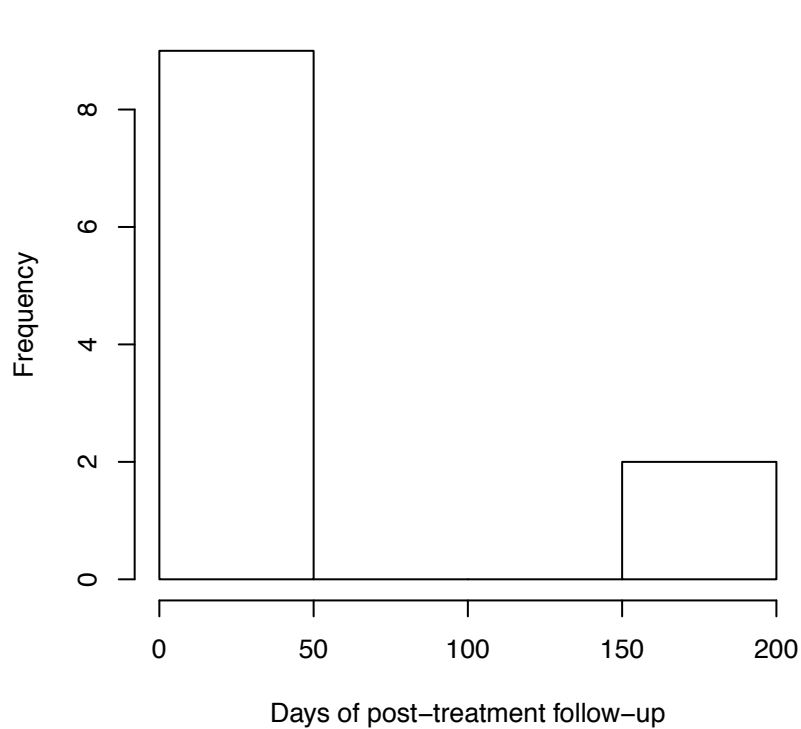

**g** APEX VEL cohort: 164 patients rebound

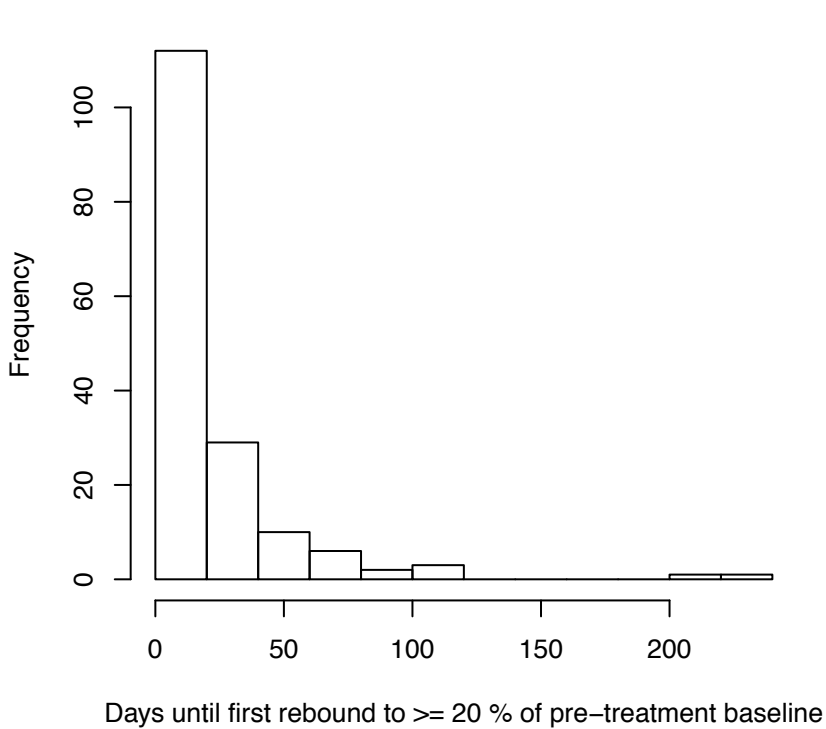

**h** APEX VEL cohort: 105 patients did not rebound

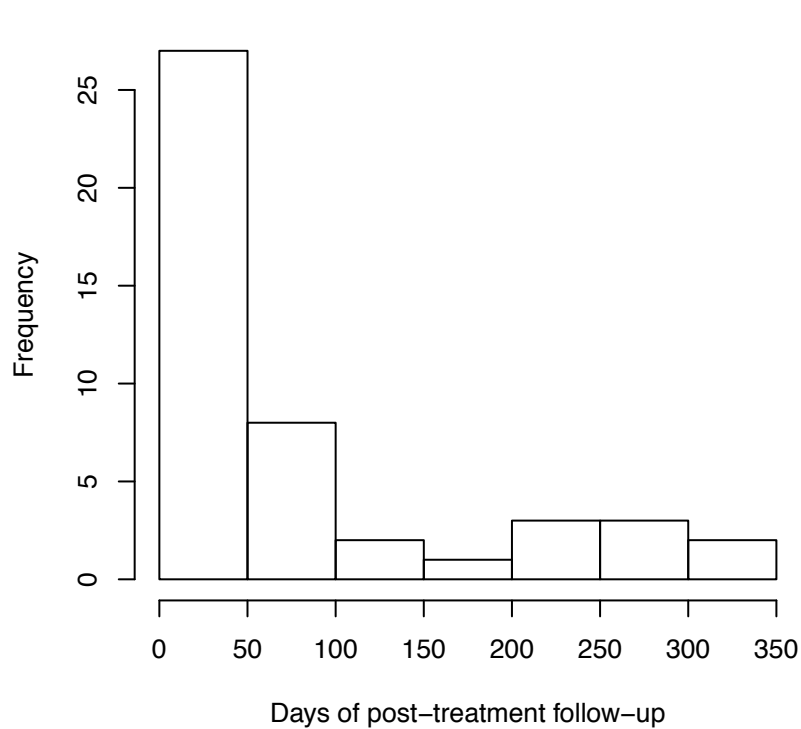

**a** MP cohort: 64 patients rebounded

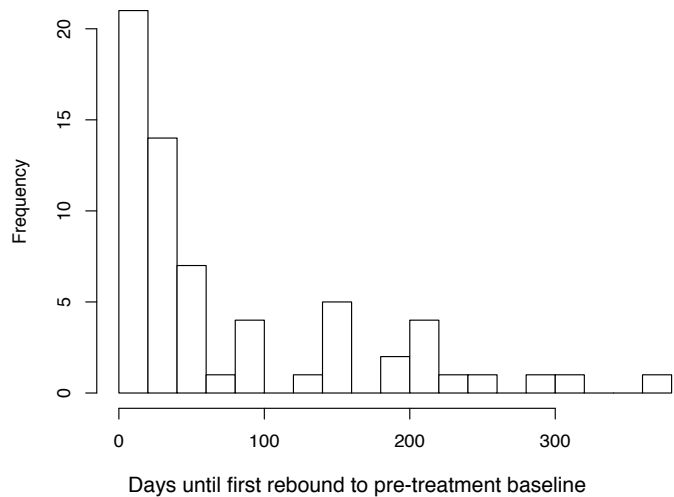

**b** MP cohort: 235 patients did not rebound

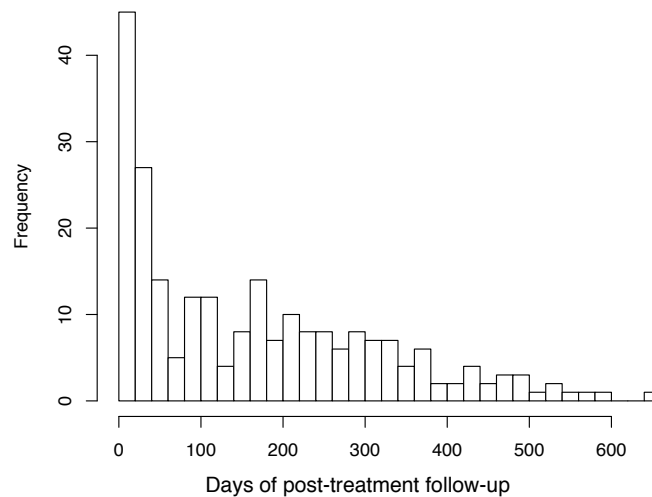

**c** VMP cohort: 13 patients rebounded

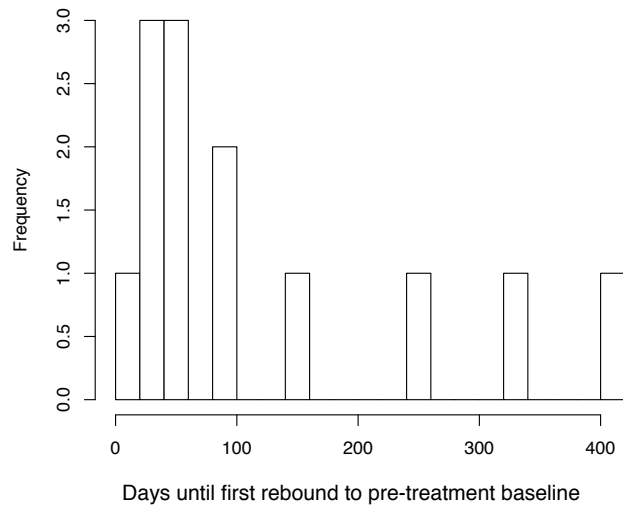

**d** VMP cohort: 287 patients did not rebound

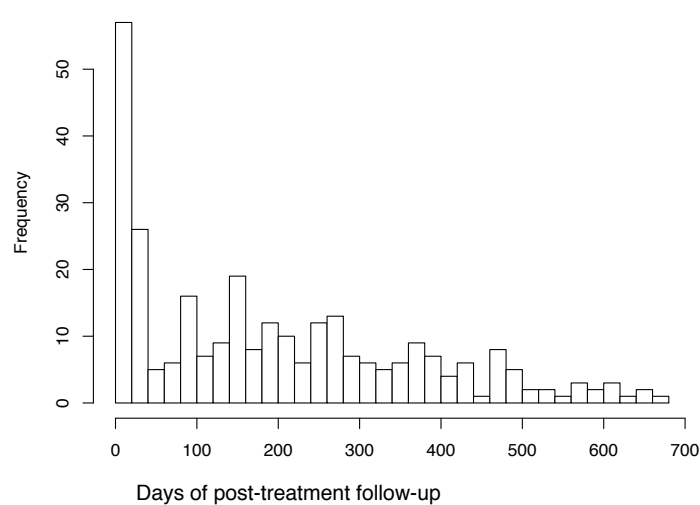

**e APEX DEX cohort: 110 patients rebound**

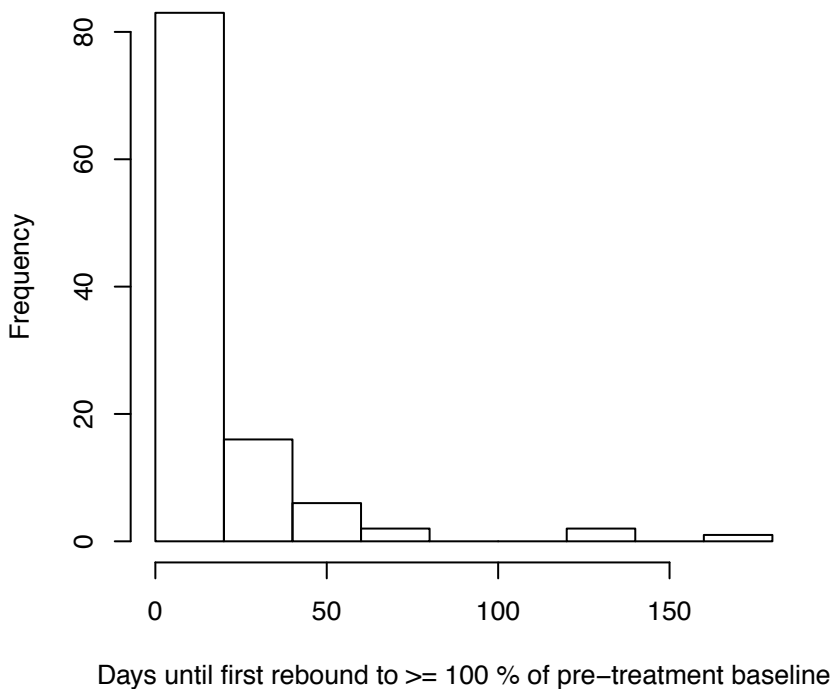

**f APEX DEX cohort: 159 patients did not rebound**

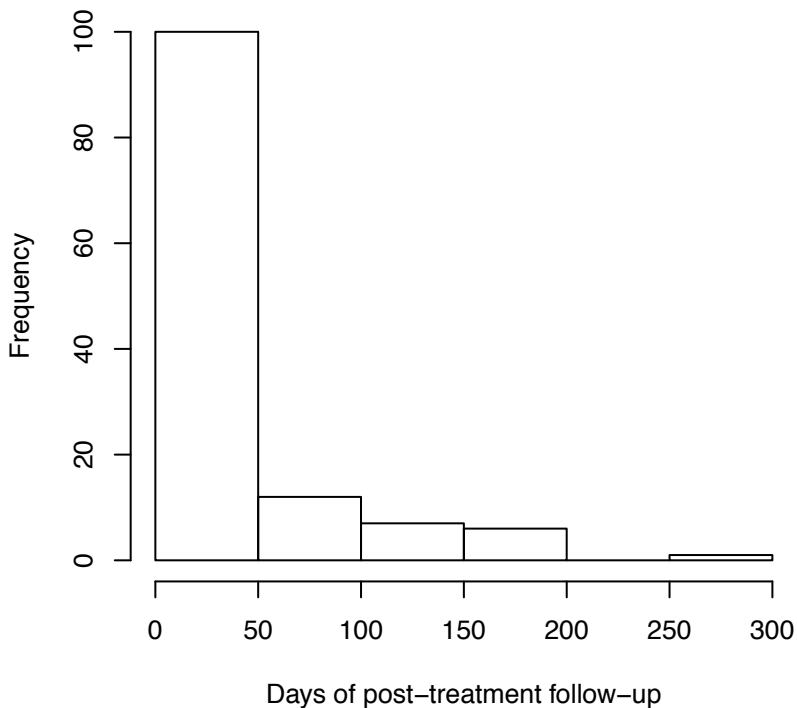

**g APEX VEL cohort: 67 patients rebound**

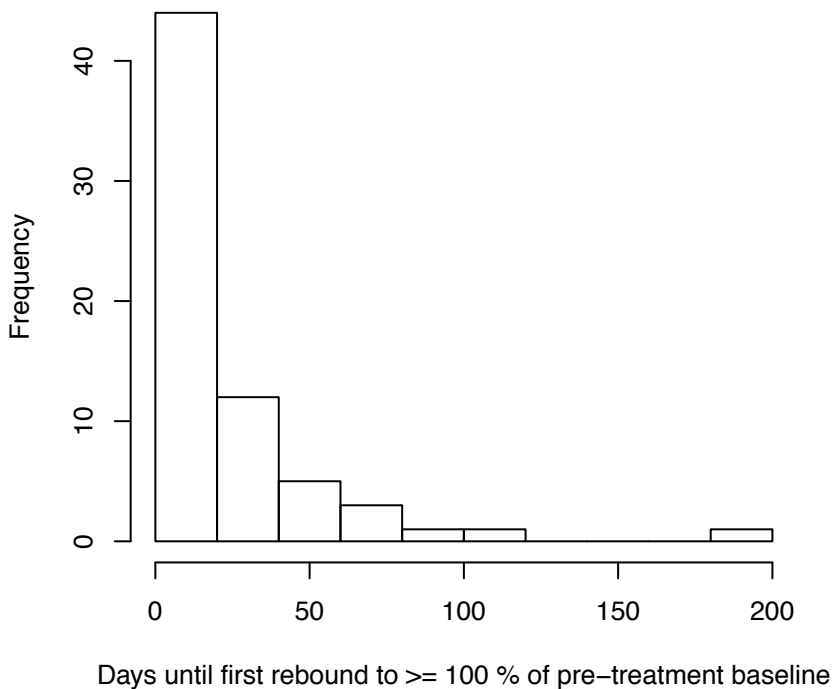

**h APEX VEL cohort: 202 patients did not rebound**

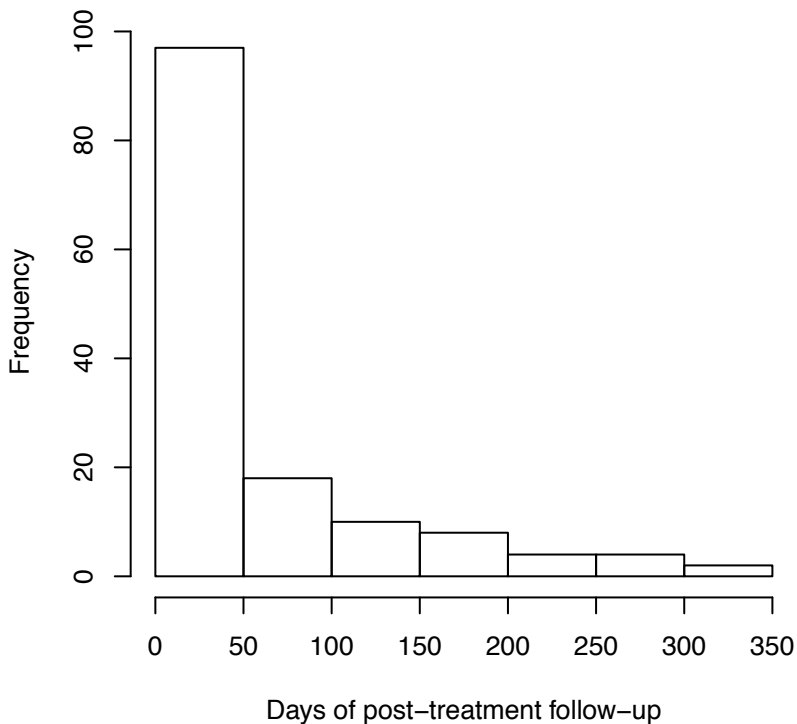

**a** MP cohort: 23 patients rebounded

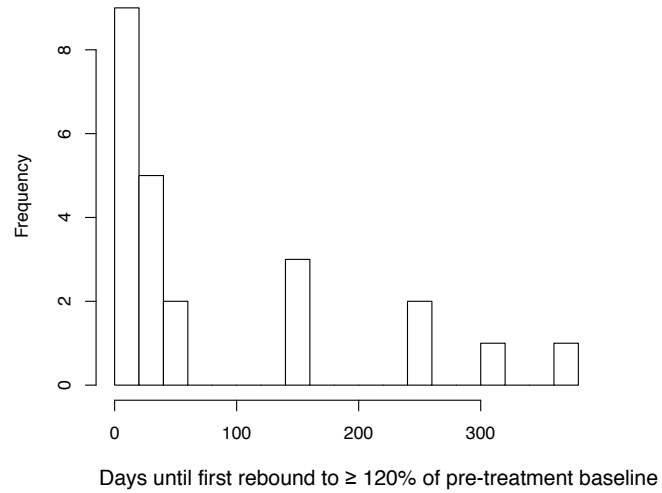

**b** MP cohort: 276 patients did not rebound

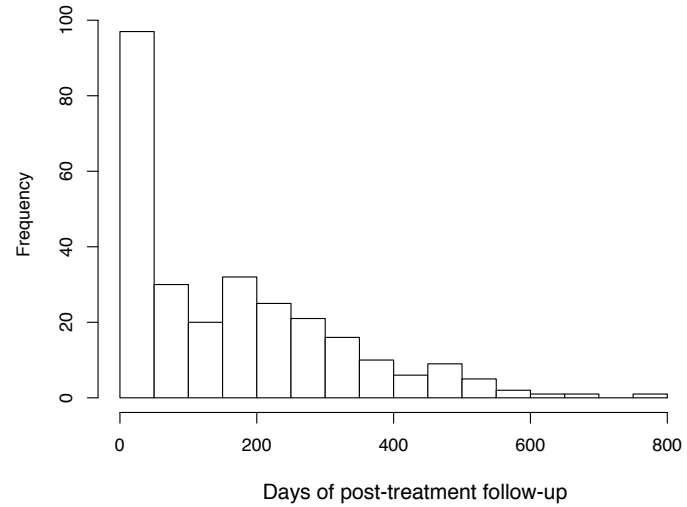

**c** VMP cohort: 297 patients did not rebound

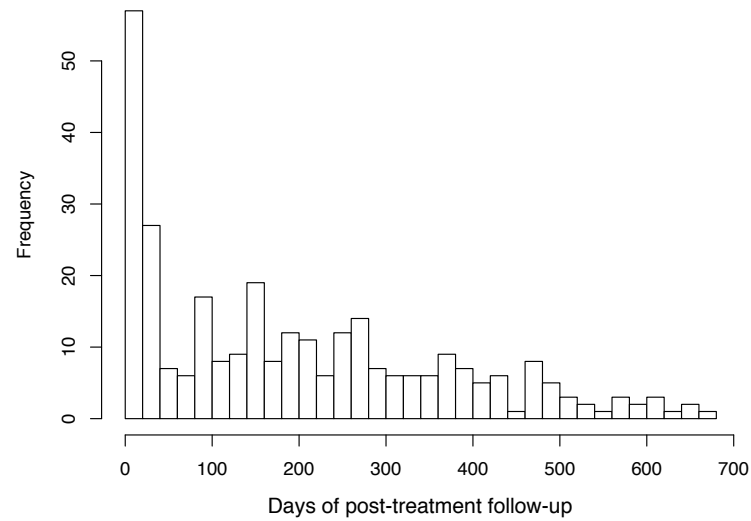



**d** APEX DEX cohort: 73 patients rebound

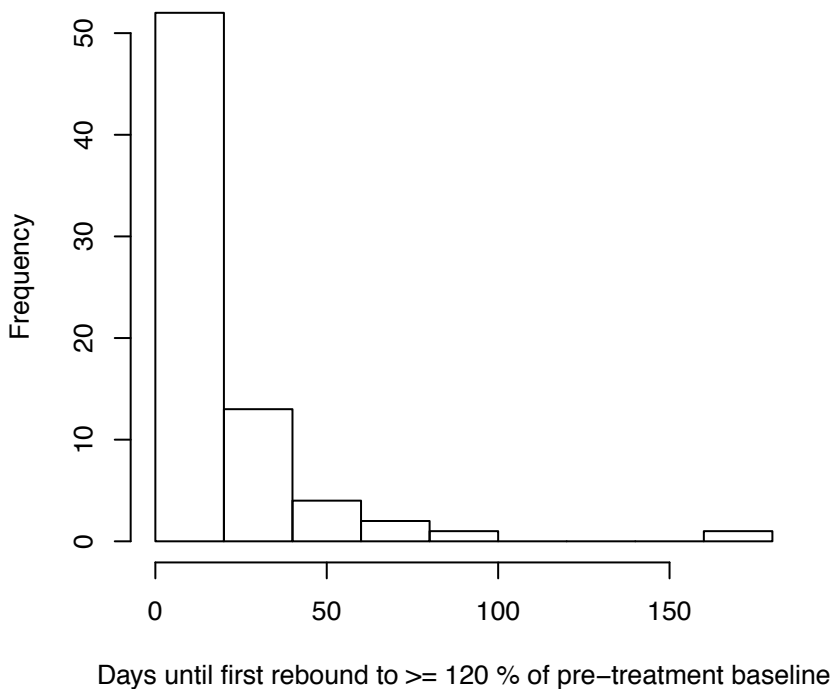

**e** APEX DEX cohort: 196 patients did not rebound

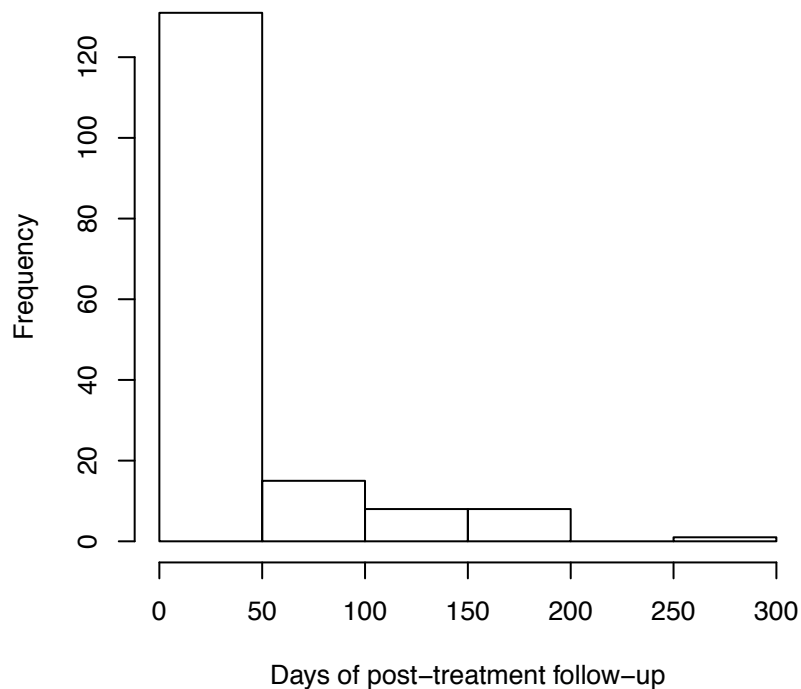

**f** APEX VEL cohort: 47 patients rebound

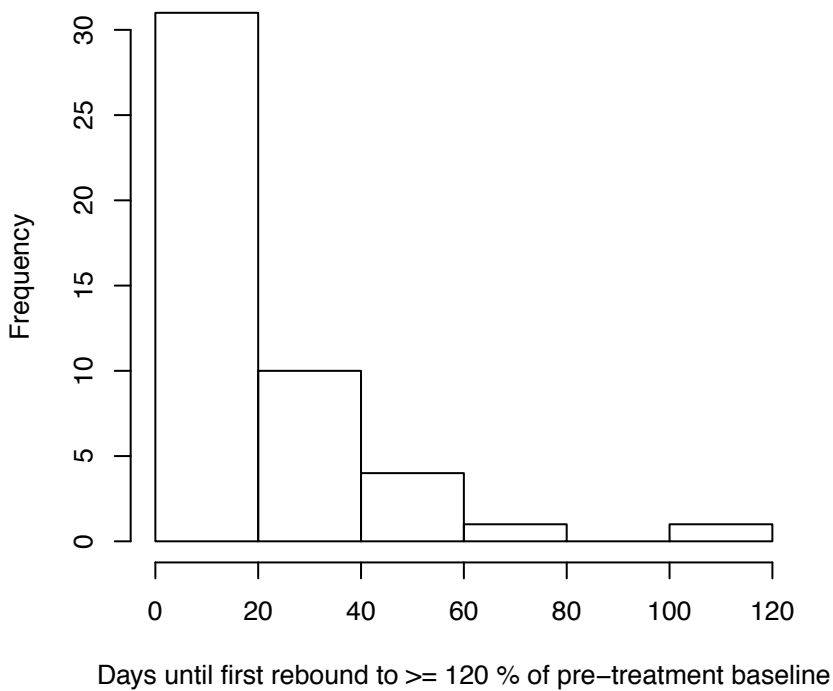

**g** APEX VEL cohort: 222 patients did not rebound

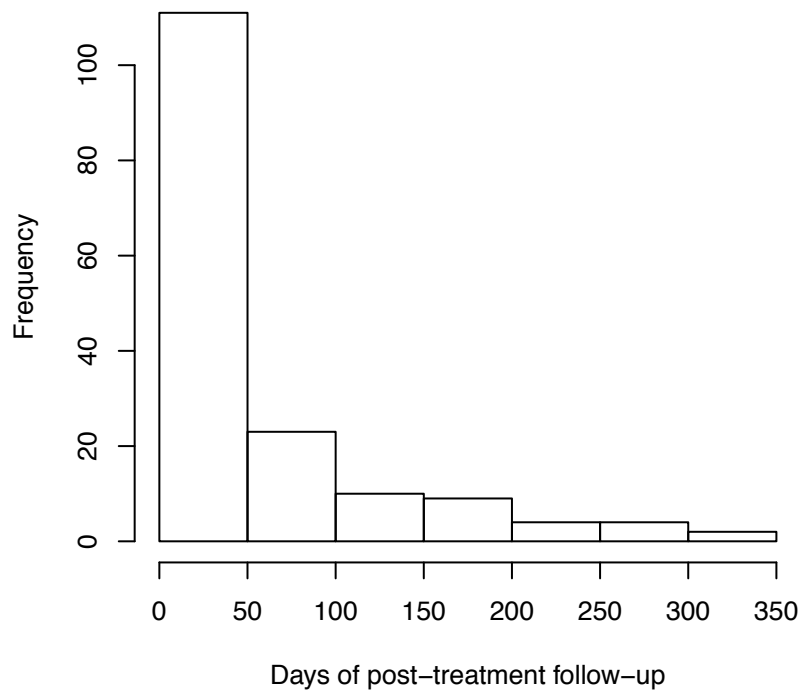

## MP cohort

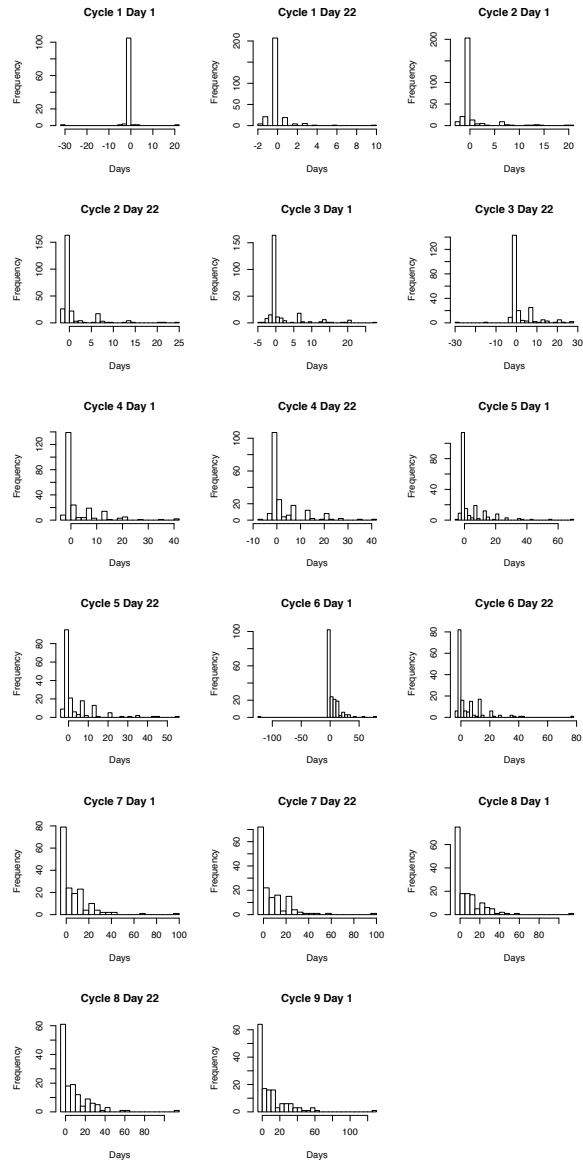

## VMP cohort

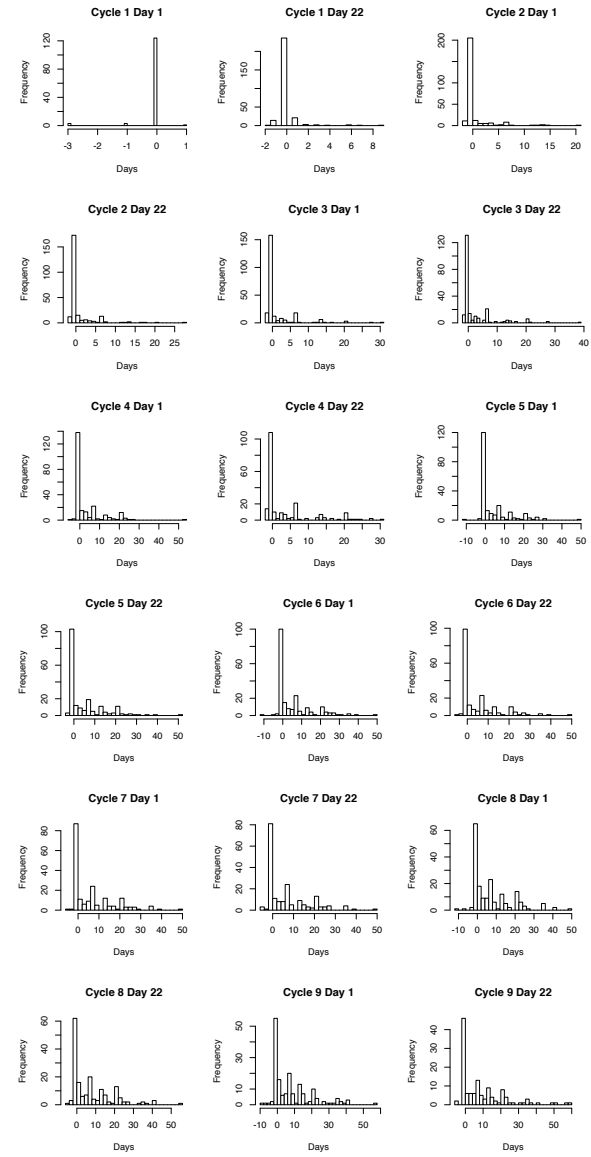

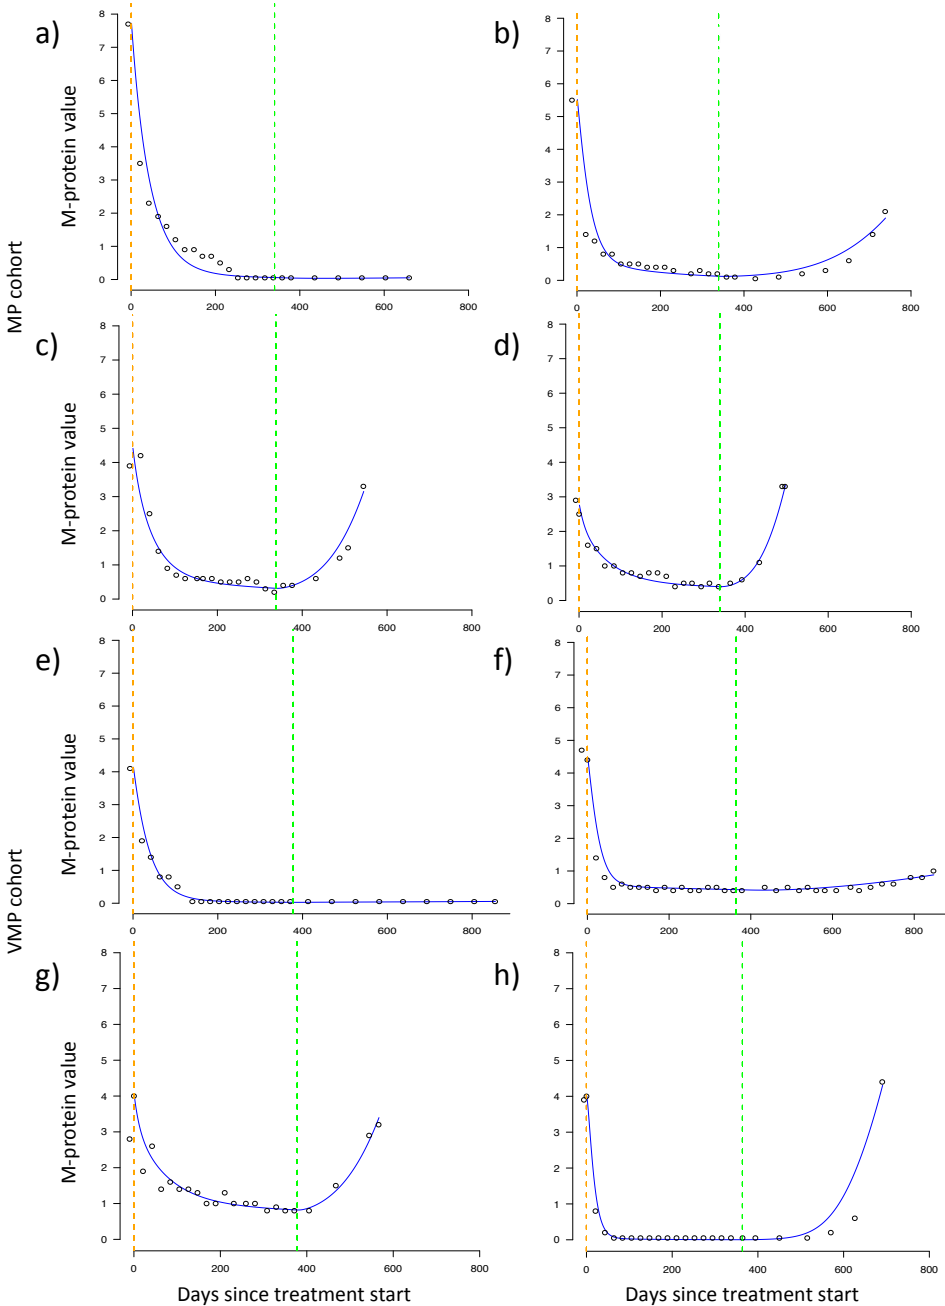

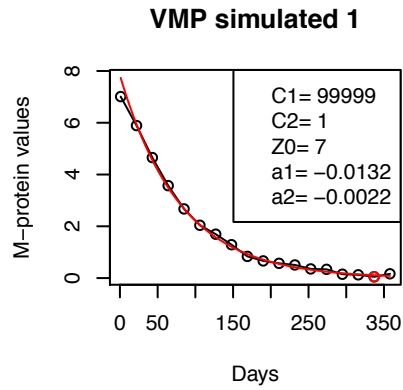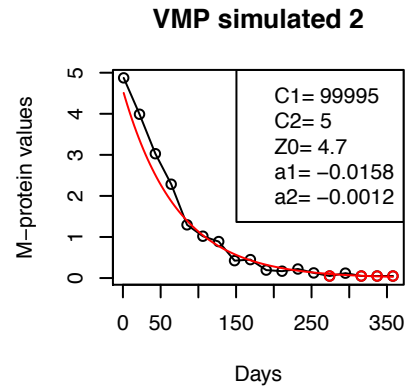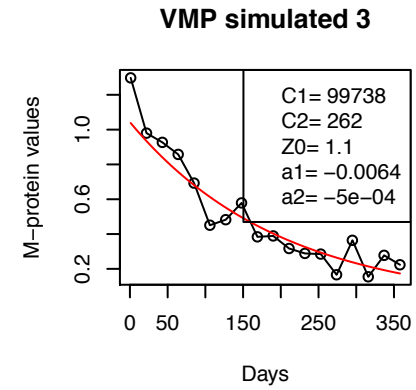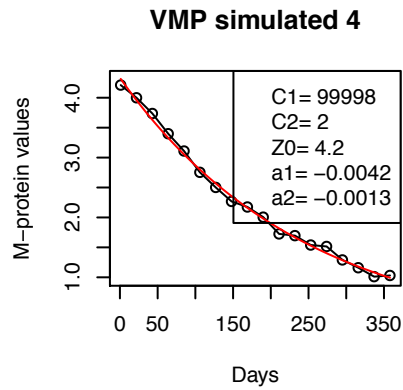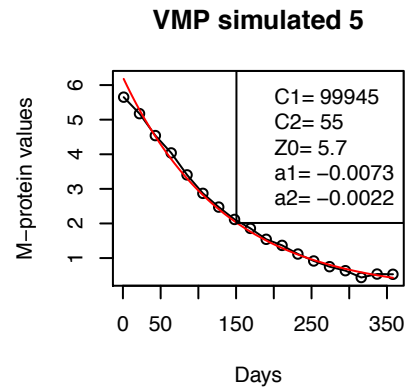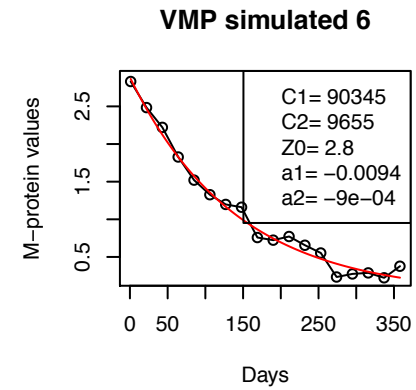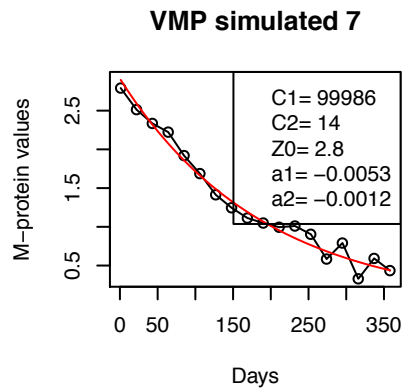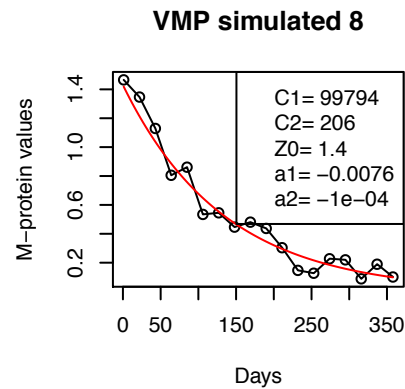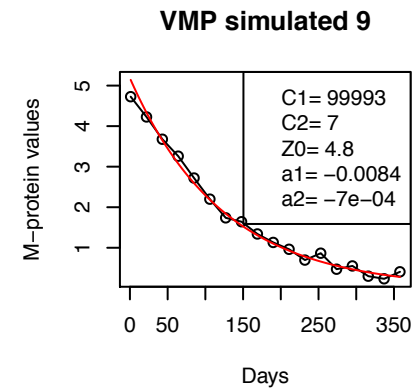

a)

VISTA MP

20 ID 300416

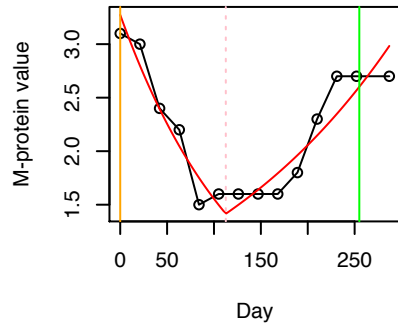

22 ID 300432

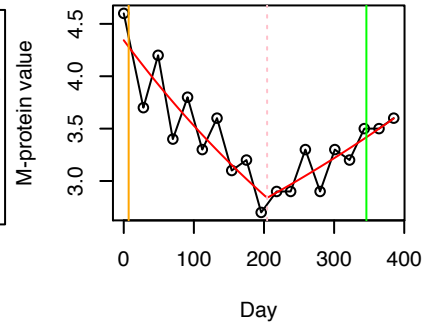

APEX DEX

101:530004

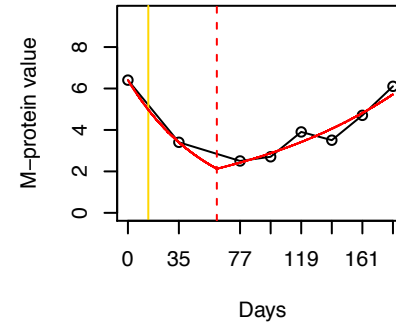

115:710002

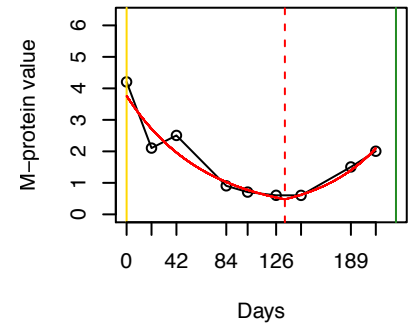

VISTA VMP

82 ID 300849

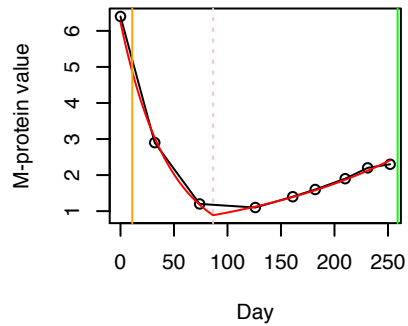

78 ID 300830

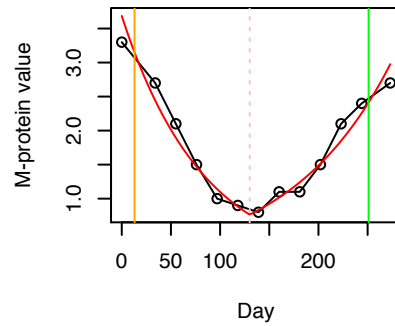

APEX VEL

31:1380015

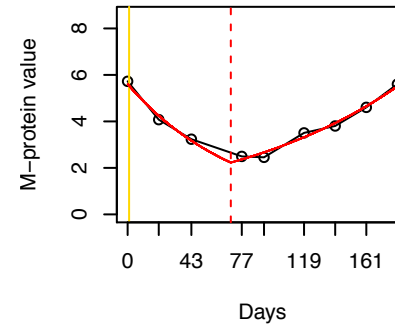

123:440004

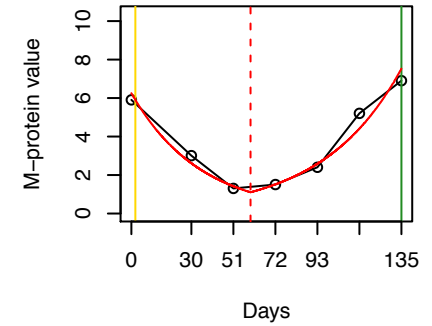

# All M-protein measurements, VISTA

Supplementary  
Figure S9

b)

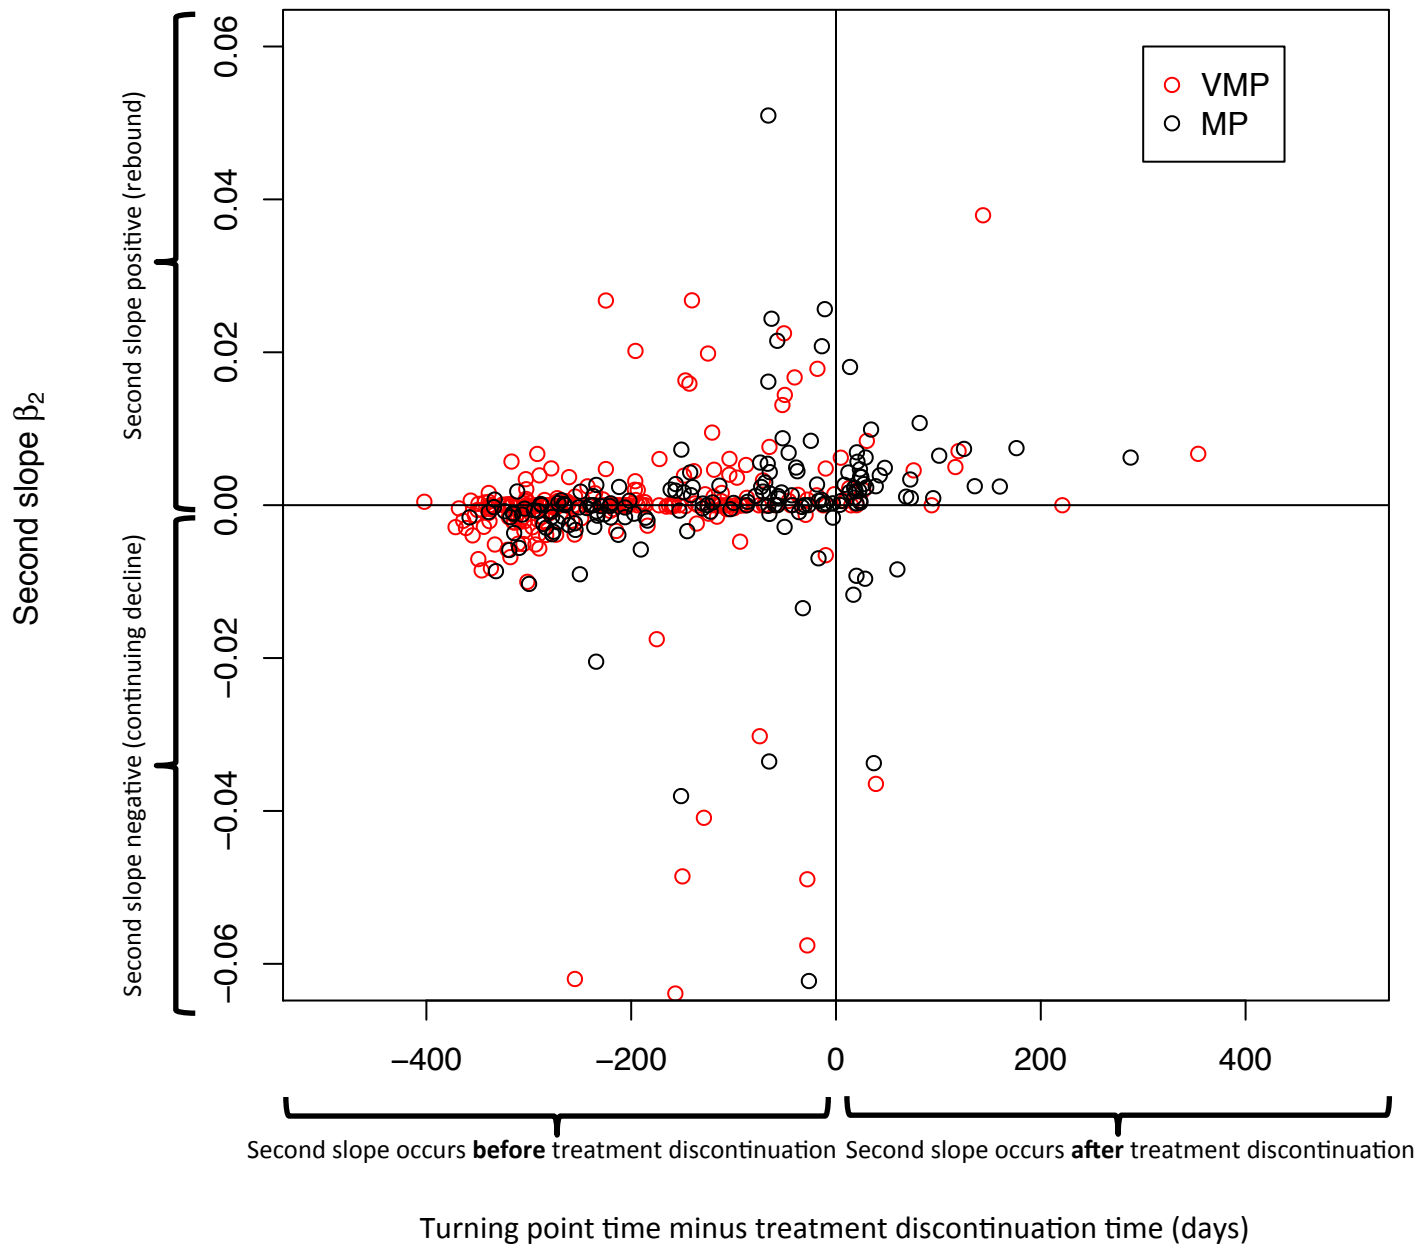

c)

### On-treatment M-protein measurements, VISTA

Supplementary Figure S9

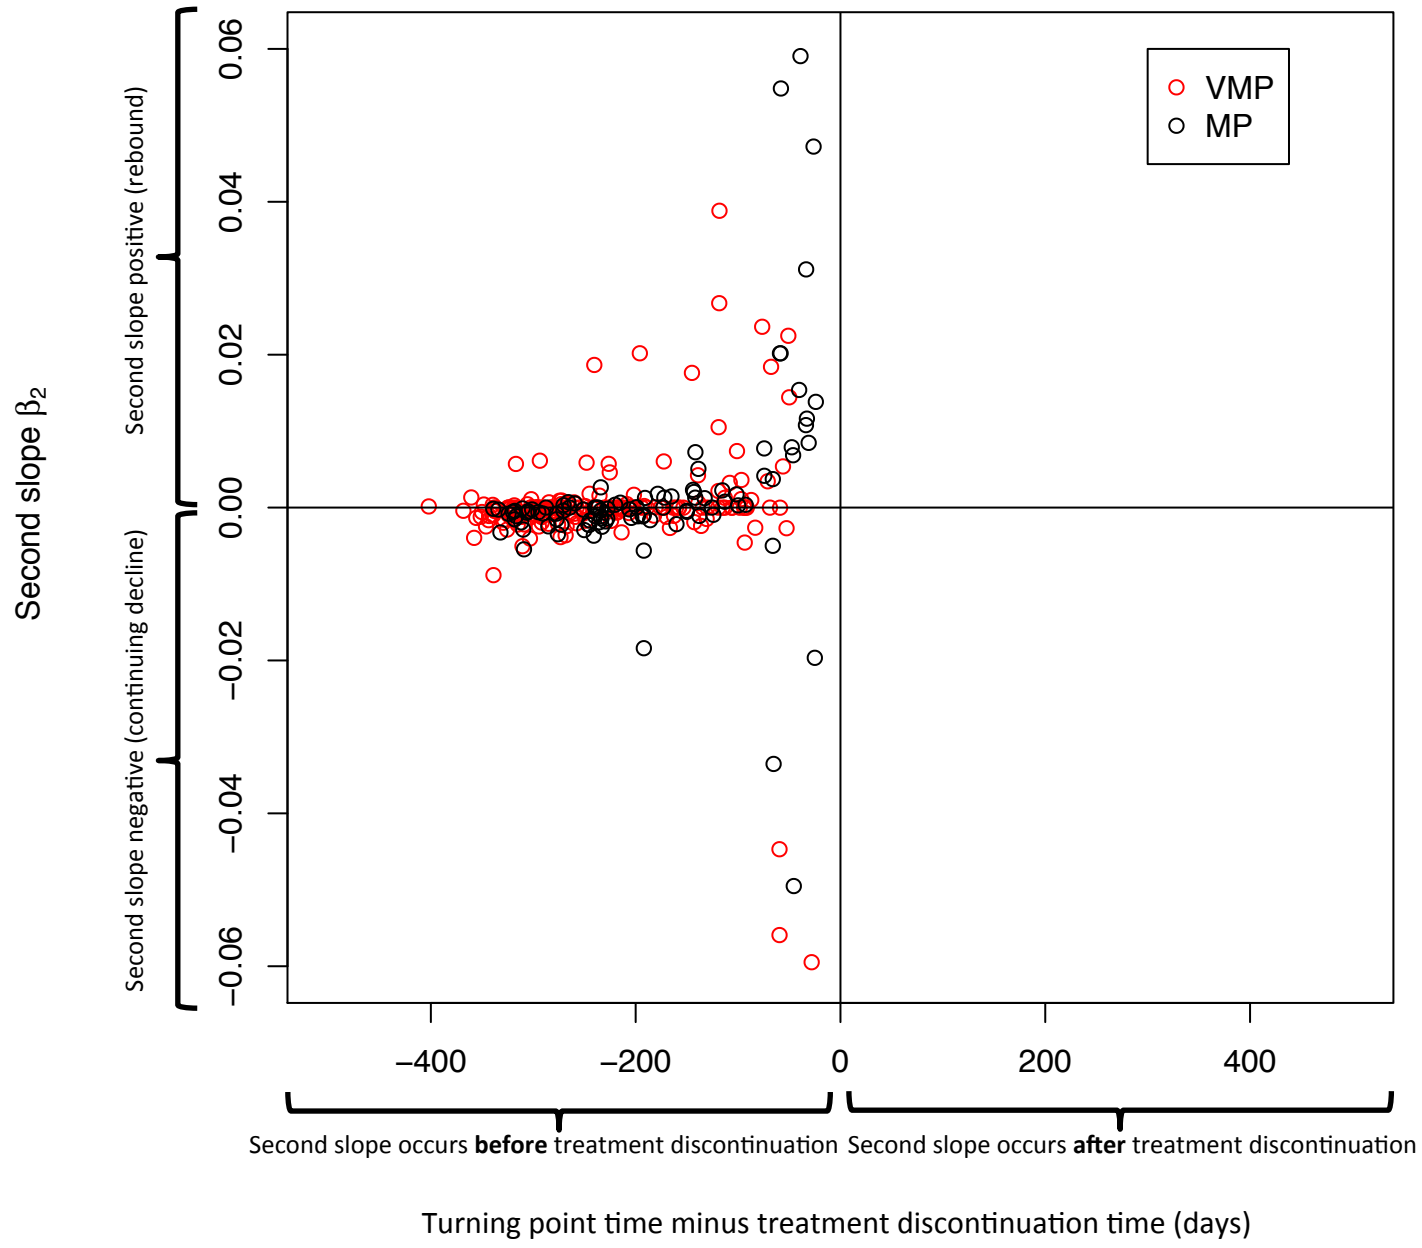

d)

### All M-protein measurements, APEX

Supplementary Figure S9

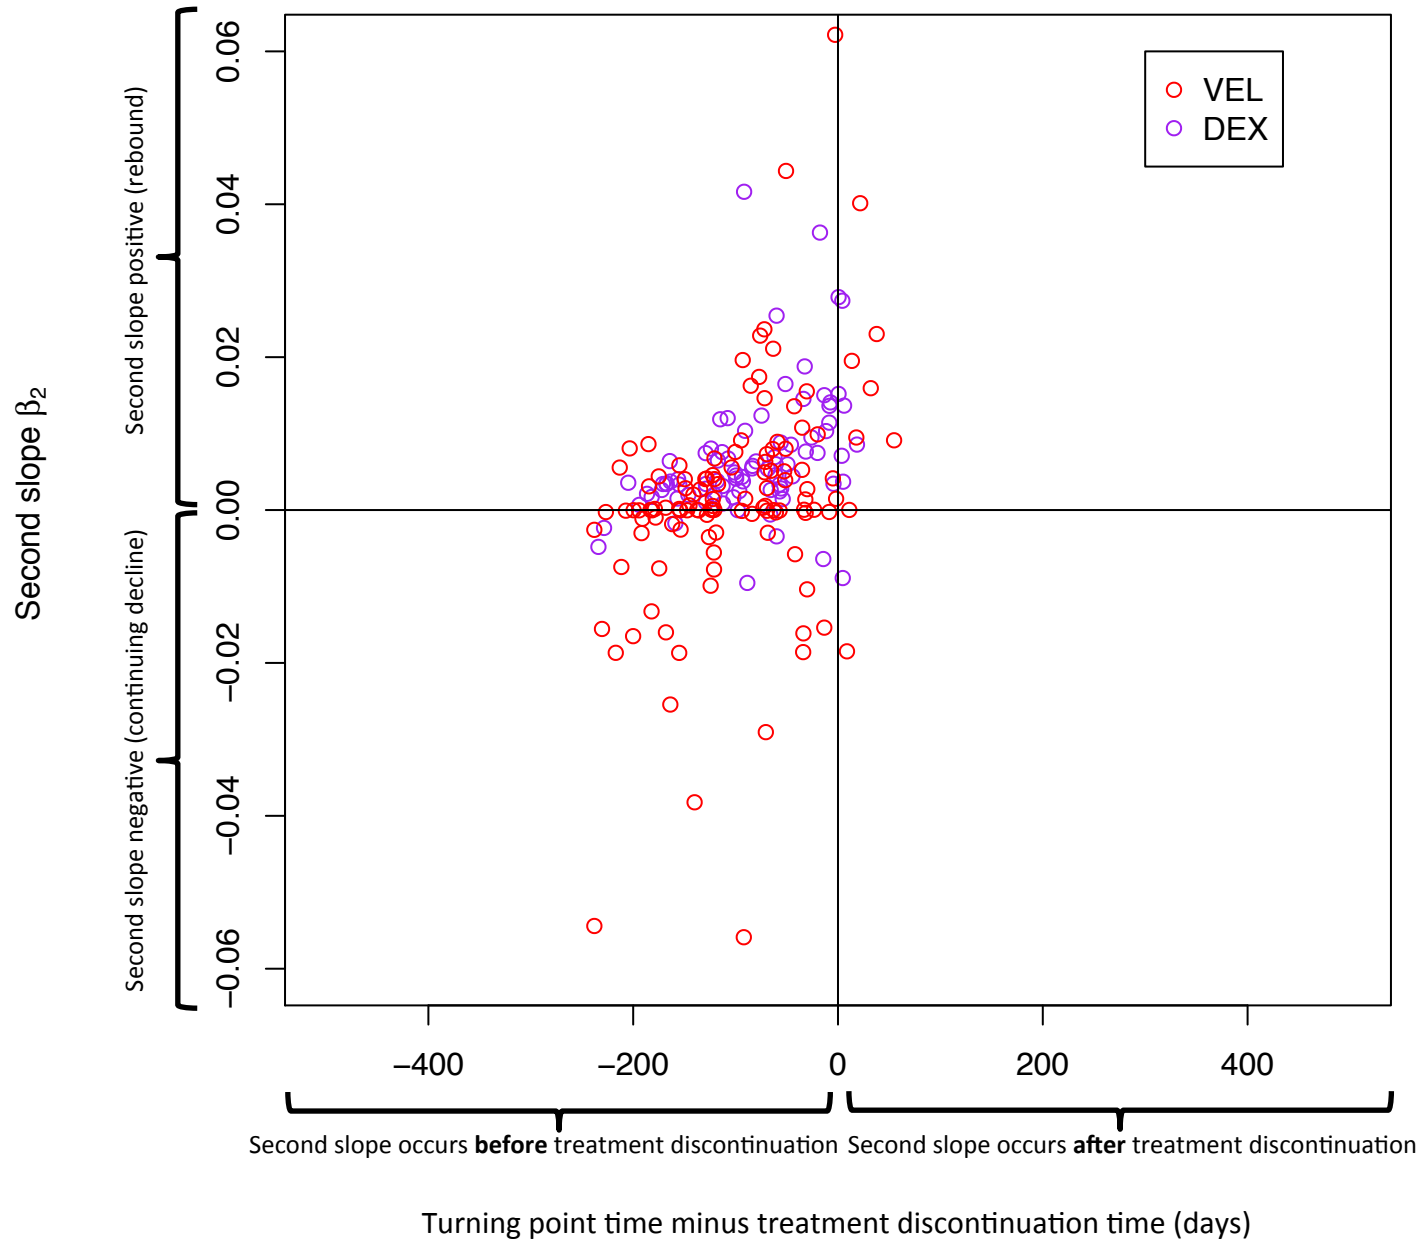



e)

### On-treatment M-protein measurements, APEX

Supplementary Figure S9

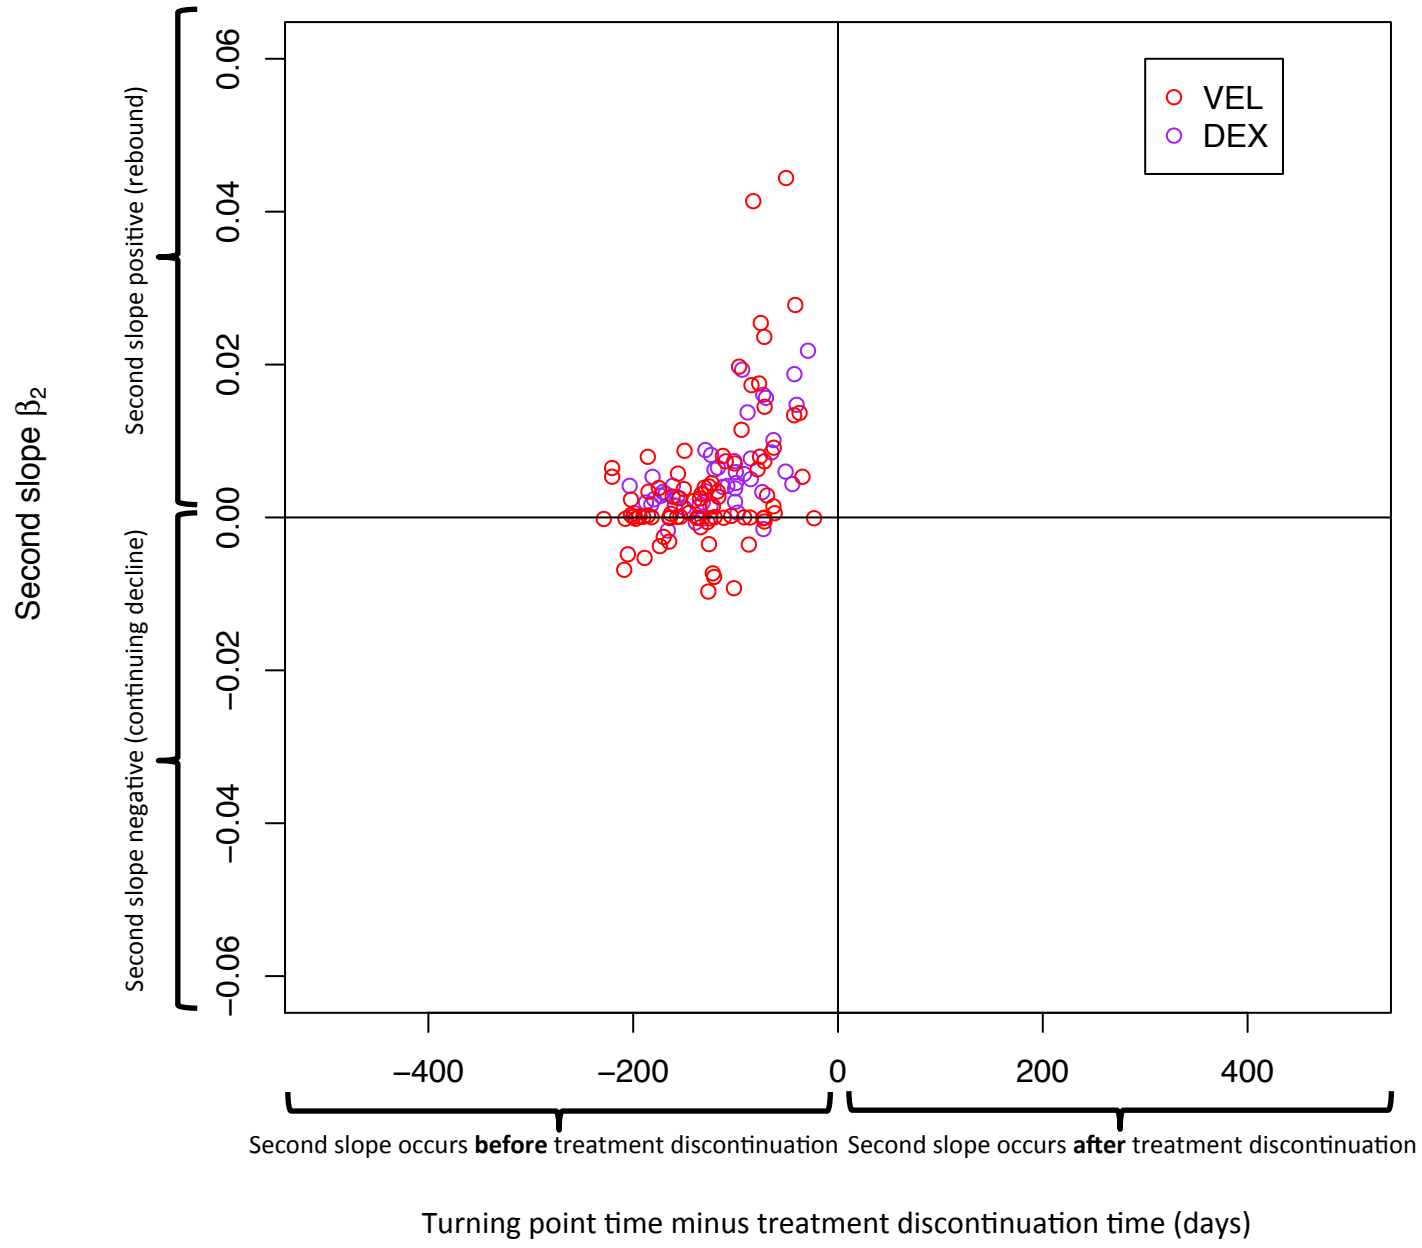

f)

Histogram on-treatment  $\beta_2$  (VISTA MP)

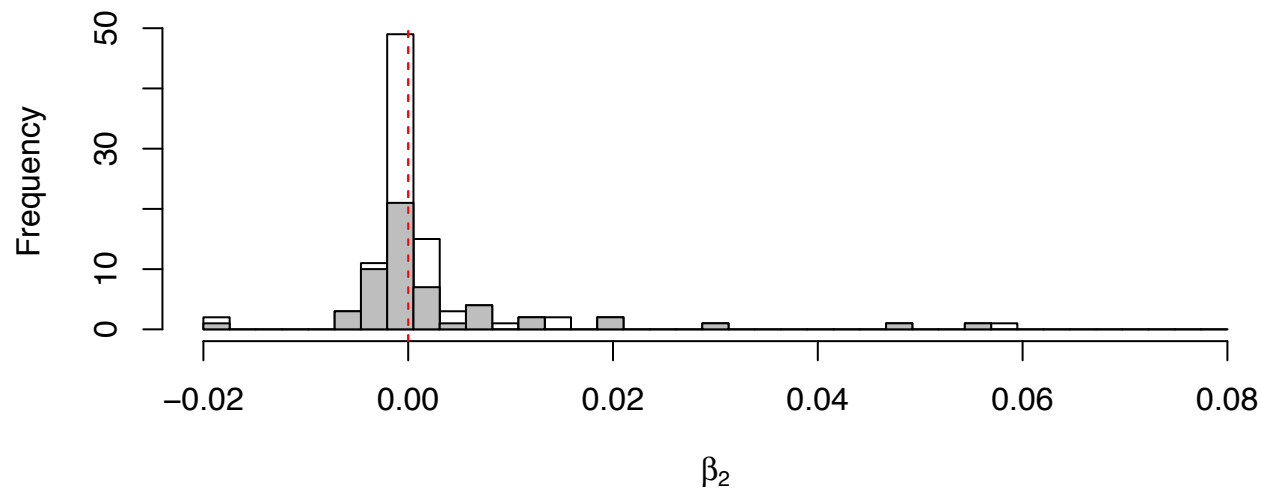

Histogram on-treatment  $\beta_2$  (VISTA VMP)

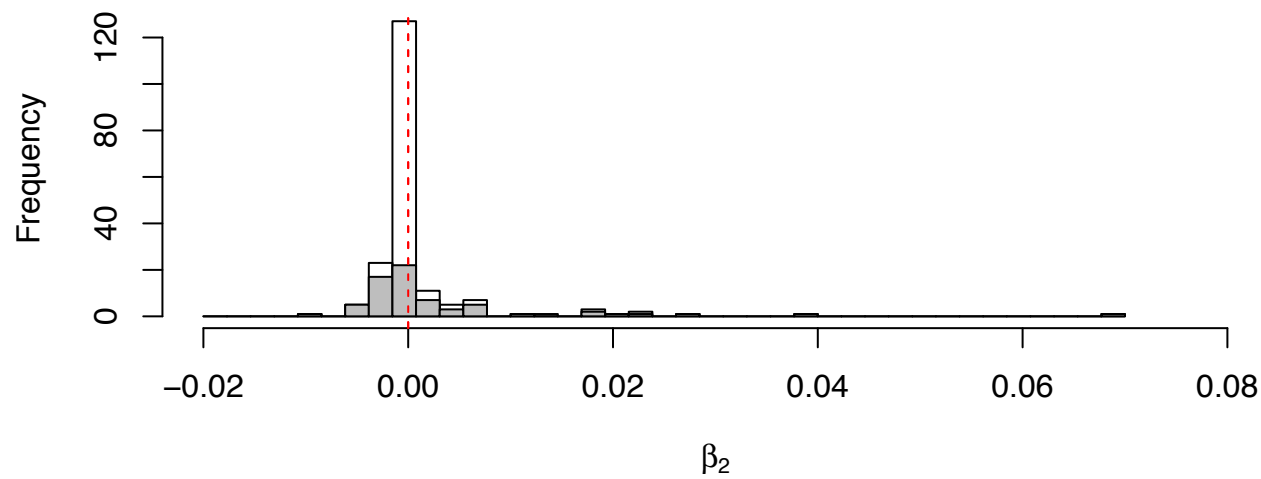

g)

Histogram on-treatment  $\beta_2$  (APEX DEX)

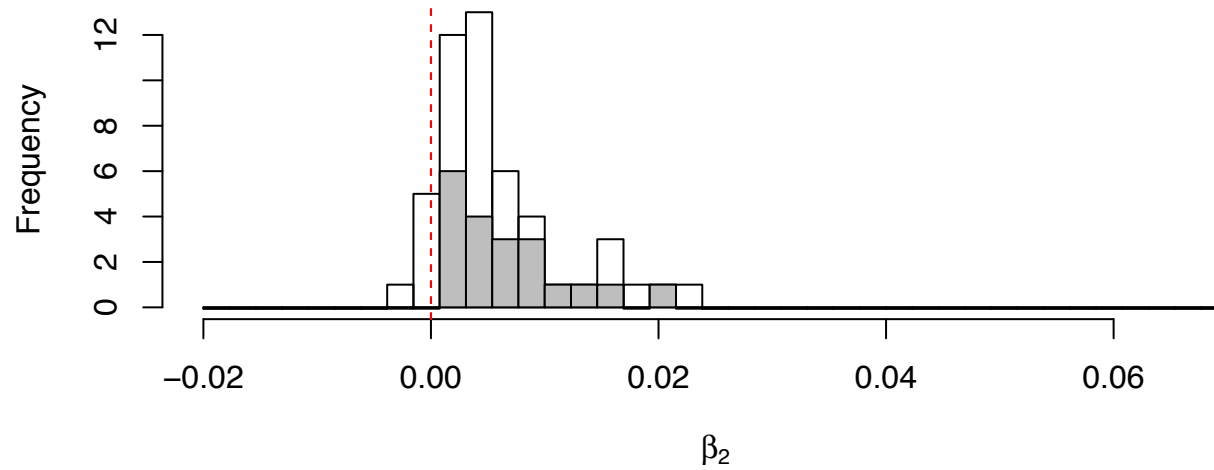

Histogram on-treatment  $\beta_2$  (APEX VEL)

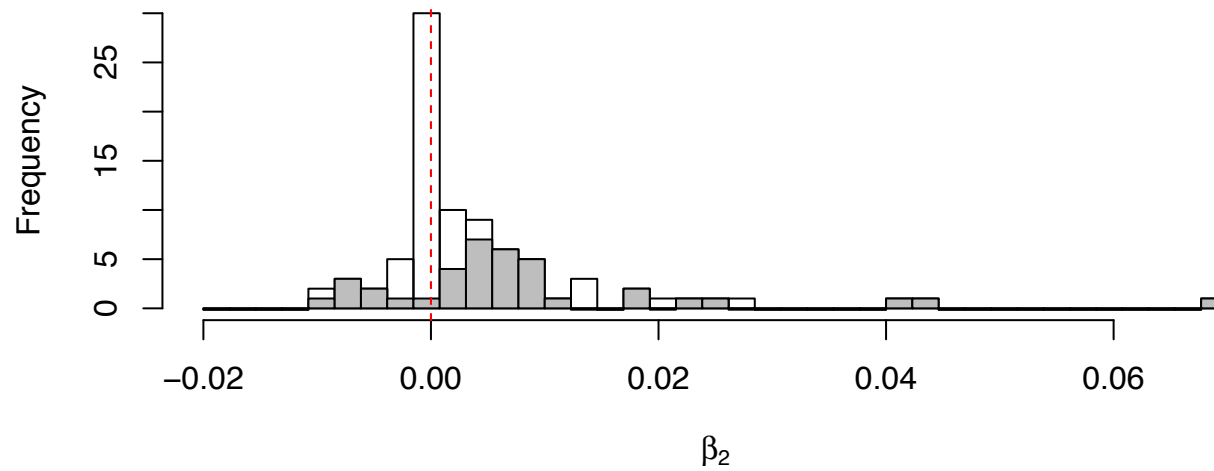

Supplement: NIHMS778458-supplement-3.pdf [file NIHMS778458-supplement-3.pdf]
